# Supplementary material for: Lipocalin 2 mediates appetite suppression during pancreatic cancer cachexia
Source: PubMed Central journal article supplement (PMC8024334; doi:10.1038/s41467-021-22361-3), 2021-04-06
Supplement: 41467_2021_22361_MOESM1_ESM.pdf [file 41467_2021_22361_MOESM1_ESM.pdf]

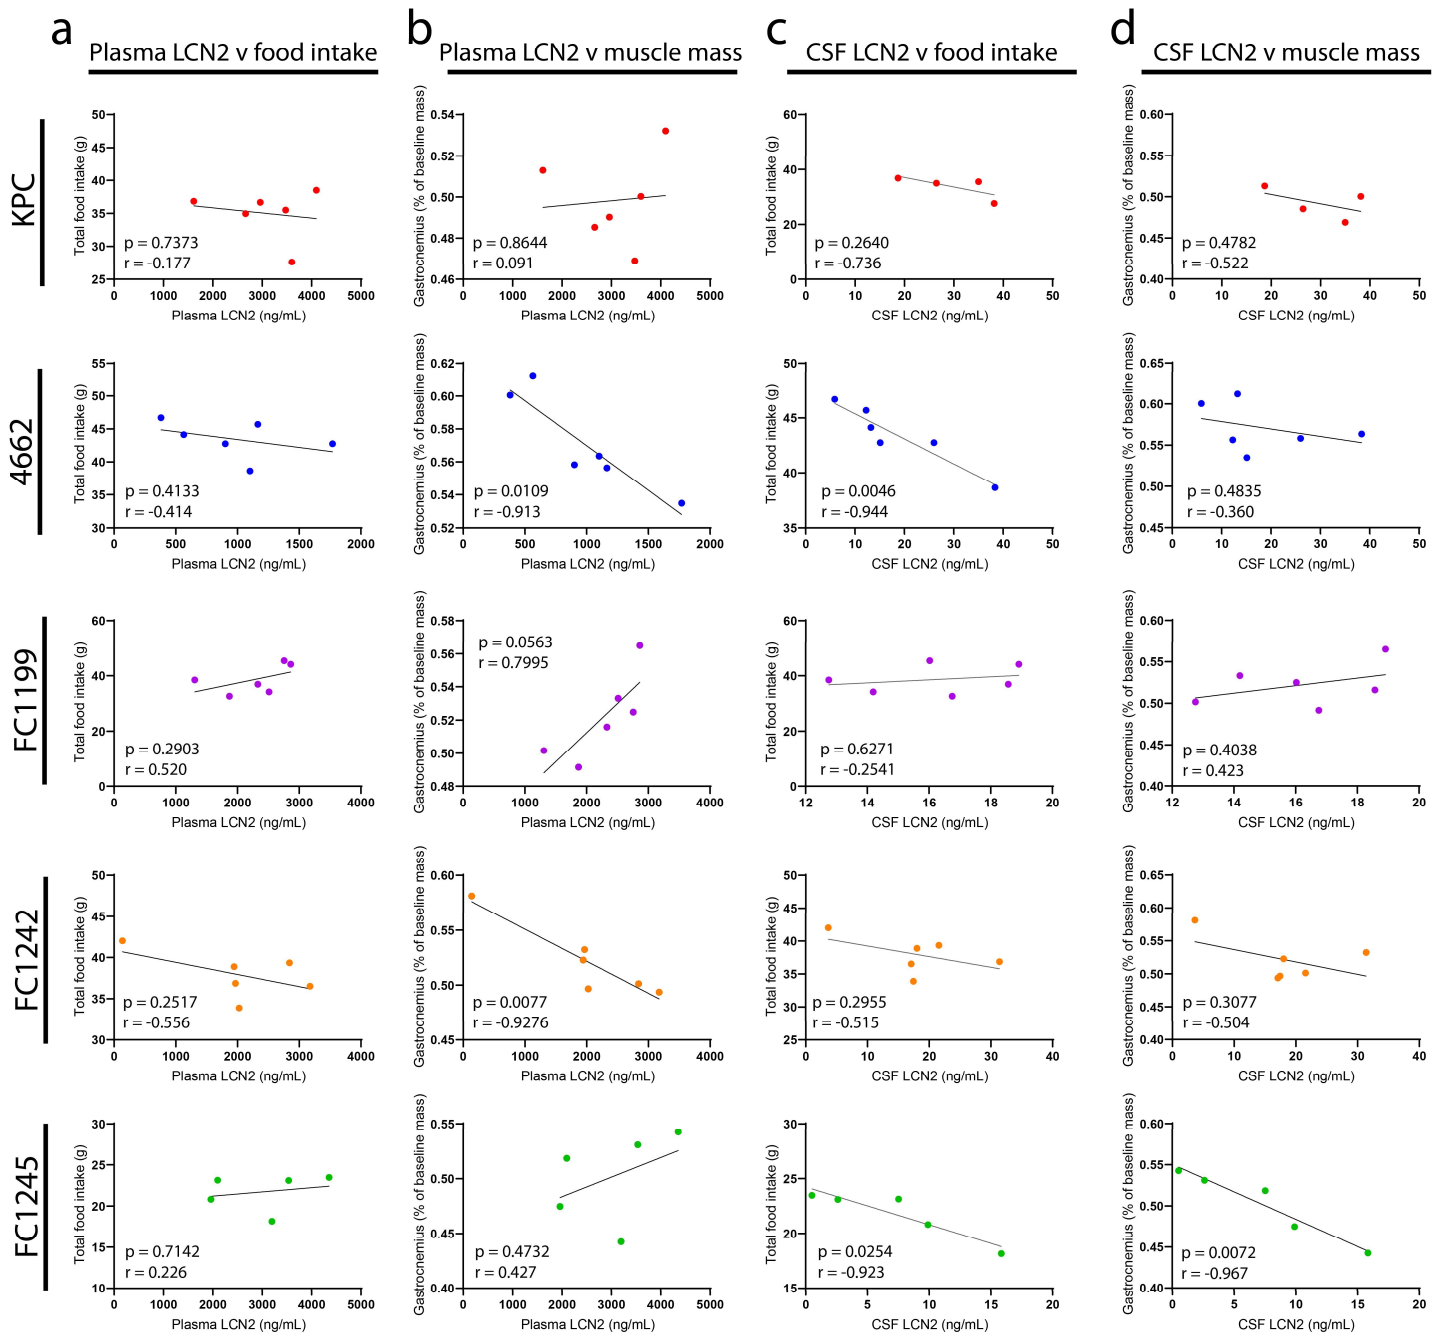

Supplementary Figure 1. Related to Figure 1K-N. Linear regression analysis between plasma LCN2 levels and (A) total food intake or (B) gastrocnemius mass for each individual pancreatic cancer cell line analyzed in Figure 1K-L. Linear regression analysis between CSF LCN2 levels and (C) total food intake or (D) gastrocnemius mass for each individual pancreatic cancer cell line analyzed in Figure 1M-N. Data were analyzed by simple linear regression and two-tailed correlation analyses. Sham operation controls = grey/black, KPC = red, FC4662 = blue, FC1199 = purple, FC1242 = orange, FC1245 = green.

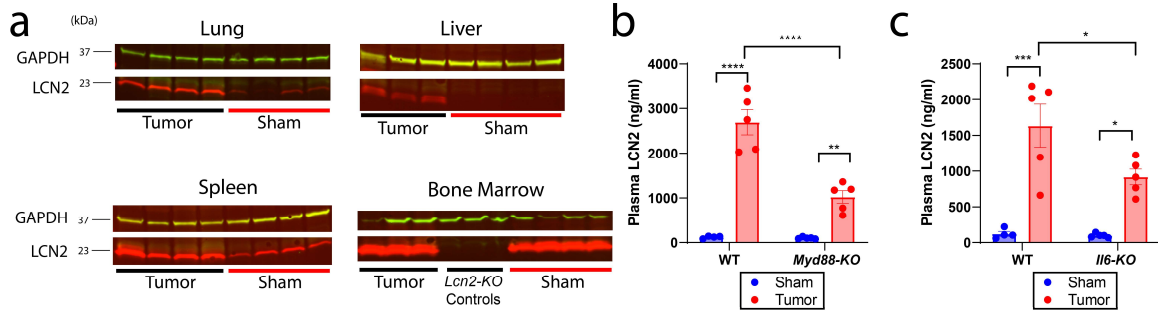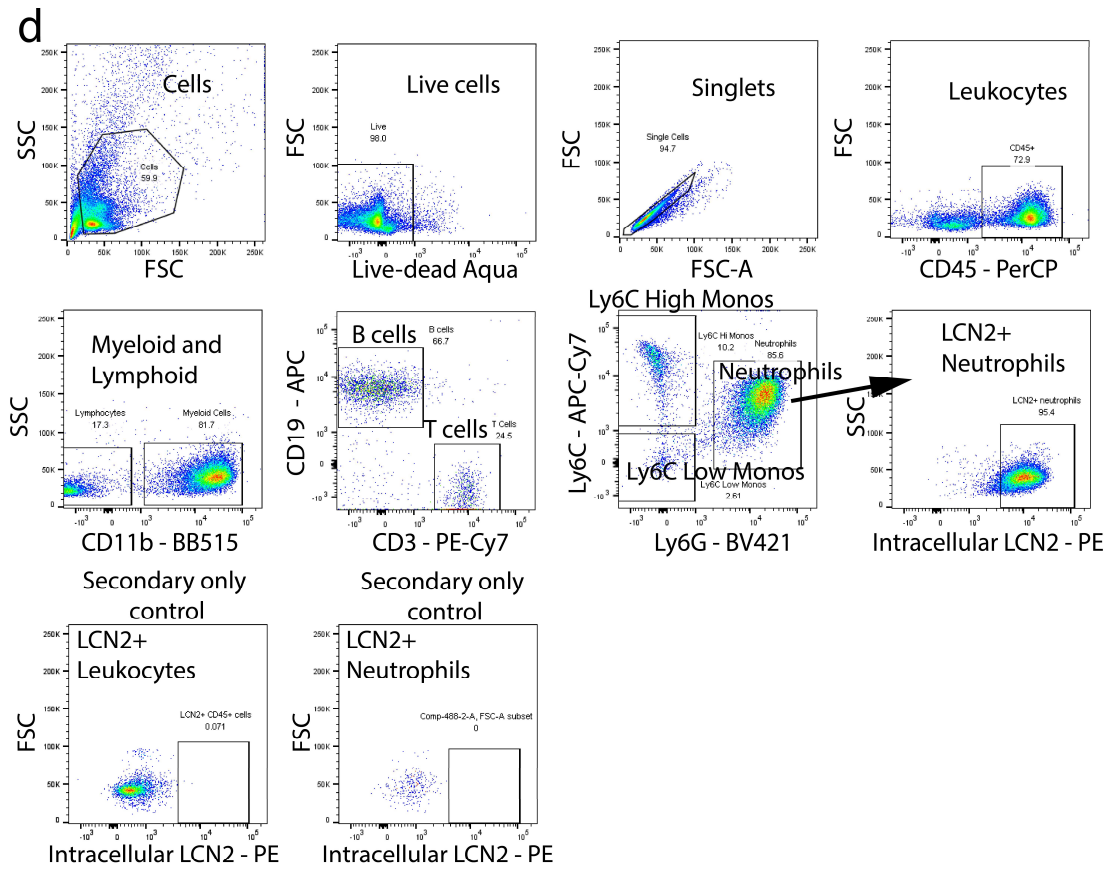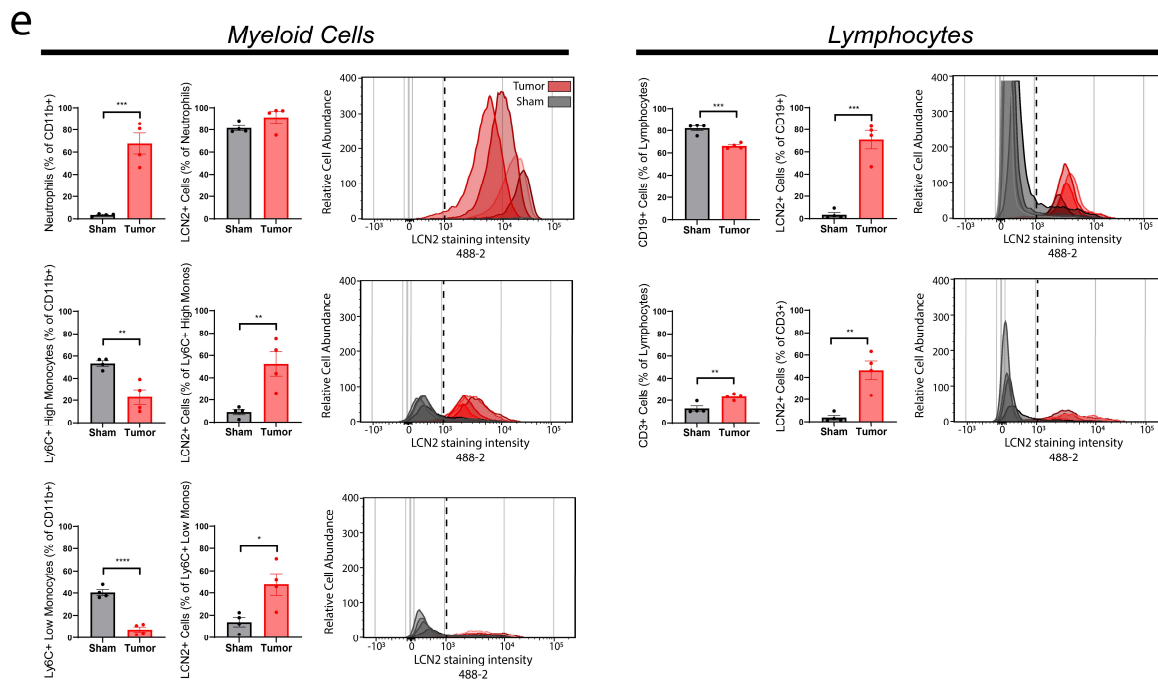

Supplementary Figure 2. Related to Figure 2. (A) Western blots used to quantify densitometry values for lung, liver, spleen, and bone marrow (n = 3-4 per group). Terminal plasma LCN2 levels in sham and tumor-bearing (B) WT and *Myd88-KO* mice (N = 5 per group for *Myd88-KO* sham, *Myd88-KO* tumor, and WT tumor groups; N = 4 for the WT sham group) and (C) WT and *IL6-KO* mice (N = 5 per group for *IL6-KO* sham, *IL6-KO* tumor, and WT tumor groups; N = 4 for the WT sham group). (D) Flow cytometry gating strategy for circulating immune cell populations and intracellular LCN2. (E) Quantification of peripheral myeloid and lymphoid cell subtypes (as a percentage of total myeloid or lymphoid cells) stained for intracellular LCN2; accompanying fluorescent intensity histograms for LCN2 staining intensity and relative cell abundance in sham and cachectic groups. Vertical dotted lines approximate gating threshold for positive intracellular LCN2 staining. Histograms represent combined overlays of individual mice (sham or tumor). For neutrophil histogram overlay, the sham control mice display minimal cell abundance, thus are marginally visible (n = 4 per group). A; LCN2 molecular weight = 23 kDa, GAPDH = 37 kDa. All data are expressed as mean  $\pm$  SEM. B; blue = sham operation controls, red = KPC engrafted mice. E; Sham operation controls = grey/black, KPC = red.

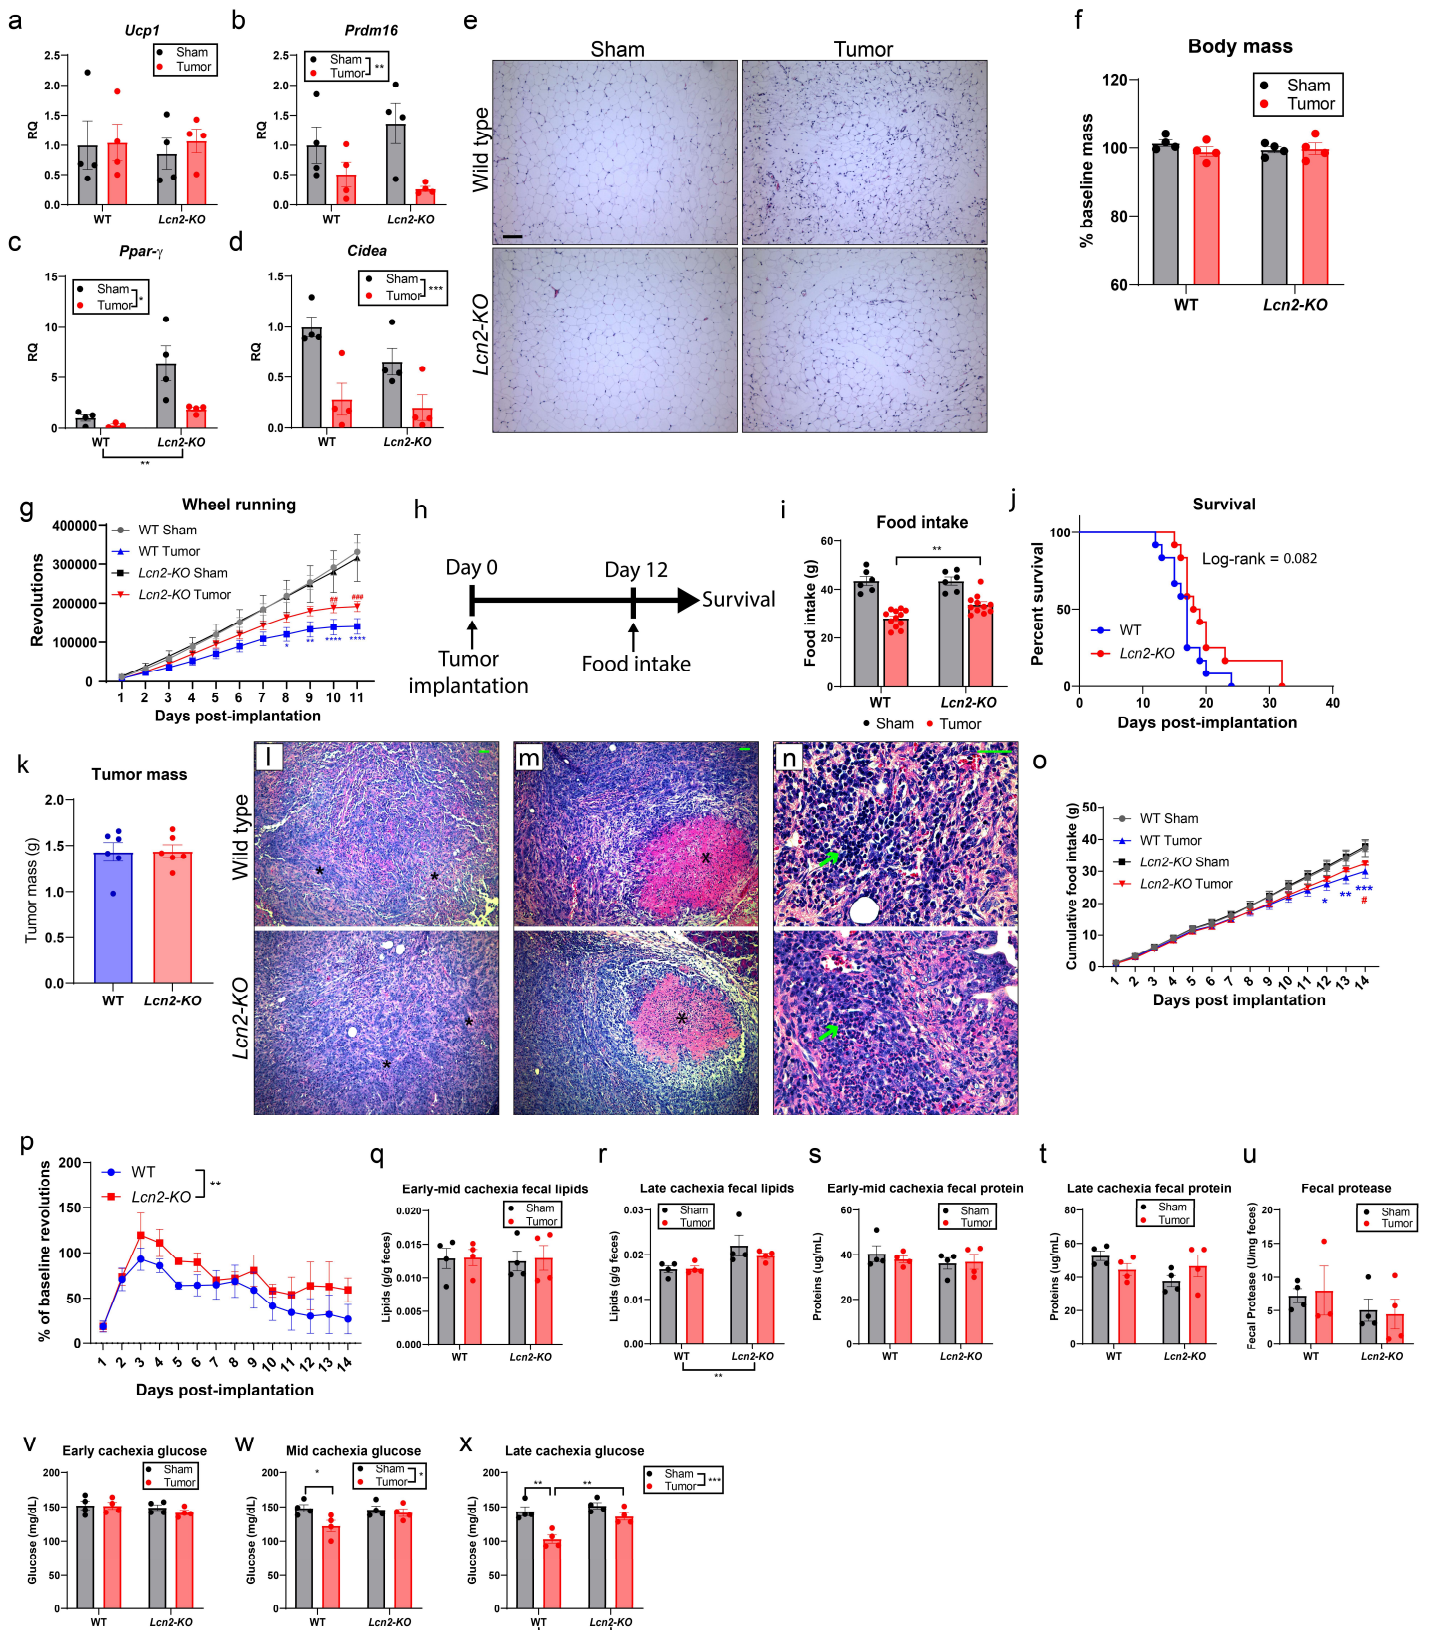

Supplementary Figure 3. Related to Figure 3. (A-D) Inguinal white adipose tissue gene expression analysis of browning genes *Ucp1*, *Prdm16*, *Ppar-γ*, and *Cidea* (N = 4 per group for all groups, except the WT tumor group in Figure 3C [N = 3]). (E) Representative H&E histochemical images of inguinal white adipose tissue of WT and *Lcn2-KO* mice after sham or tumor implantation (10x magnification, scale bar = 100 μm). (F) Terminal tumor-free mass of WT and *Lcn2-KO* mice after sham or tumor implantation (n = 4 per group). (G) Cumulative voluntary wheel running after tumor implantation or sham

operation in WT and *Lcn2-KO* mice (N = 6 per group for WT sham, WT tumor, and *Lcn2-KO* tumor groups; N = 7 for the *Lcn2-KO* sham group). (H) Experimental design for survival study and food consumption assessments. (I) Day 12 total food intake during survival study. (J) Kaplan Meier survival curve comparing WT and *Lcn2-KO* tumor-engrafted mice compared by log rank test. n = 6-12 per group for B-D. (K) Terminal tumor mass for WT and *Lcn2-KO* mice (n = 6 per group). Histopathologic characteristics of KPC allografts showing (L) ragged stromal infiltration, (M) geographical necrosis, and (N) acute inflammatory infiltrates after implantation into WT and *Lcn2-KO* mice (scale bar = 100  $\mu$ m). (O) Cumulative food intake in WT and *Lcn2-KO* mice implanted with fewer KPC pancreatic cancer cells ( $0.75 \times 10^6$ ) than in Figure 3 (n = 4 per group). (P) Normalized voluntary wheel running data in WT and *Lcn2-KO* mice orthotopically implanted with  $0.75 \times 10^6$  KPC cells after a 3 week acclimation period (n = 4 per group). (Q) Early-mid and (R) late-stage cachexia fecal lipid levels in WT and *Lcn2-KO* mice (n = 4 per group). (S) Early-mid (days 1-6) and (T) late-stage (days 7-11) cachexia fecal protein levels in WT and *Lcn2-KO* mice (n = 4 per group). (U) Terminal fecal protease activity in WT and *Lcn2-KO* mice (n = 4 per group). (V) Early (day 4), (W) mid (day 8), and (X) late-stage (day 11) blood glucose levels in WT and *Lcn2-KO* mice (n = 4 per group). Repeated food intake and wheel running data were analyzed by a repeated-measures Two-way ANOVA followed by Bonferroni's post hoc test (G, O, P). Total food intake, gene expression data, body mass, fecal analyses, and glucose levels were analyzed by ordinary Two-way ANOVA followed by Bonferroni's post hoc test (A-F, I, Q-X). (J) Data was analyzed by a log-rank test (two-tailed). All data are expressed as mean  $\pm$  SEM. A-F, I, Q-X; Sham operation controls = grey/black, KPC-engrafted mice = red. G, J, K, O, P; Gray = WT sham operation control; Black = *Lcn2-KO* sham operation control; Blue = WT KPC-engrafted mice; Red = *Lcn2-KO* KPC-engrafted mice.

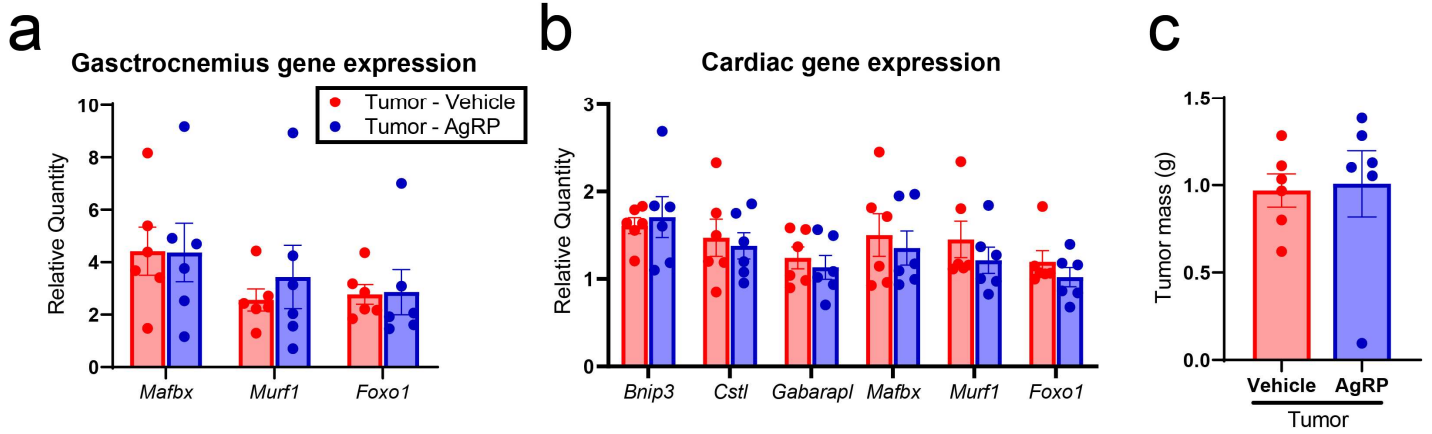

Supplementary Figure 4. Related to Figure 4. (A) Gastrocnemius and (B) cardiac tissue ubiquitin ligase and autophagy pathway gene analysis. (C) Terminal tumor mass. n = 6 per group. All data are expressed as mean  $\pm$  SEM. Red = KPC-engrafted, ICV vehicle treated mice, Blue = KPC-engrafted, ICV AgRP treated mice.

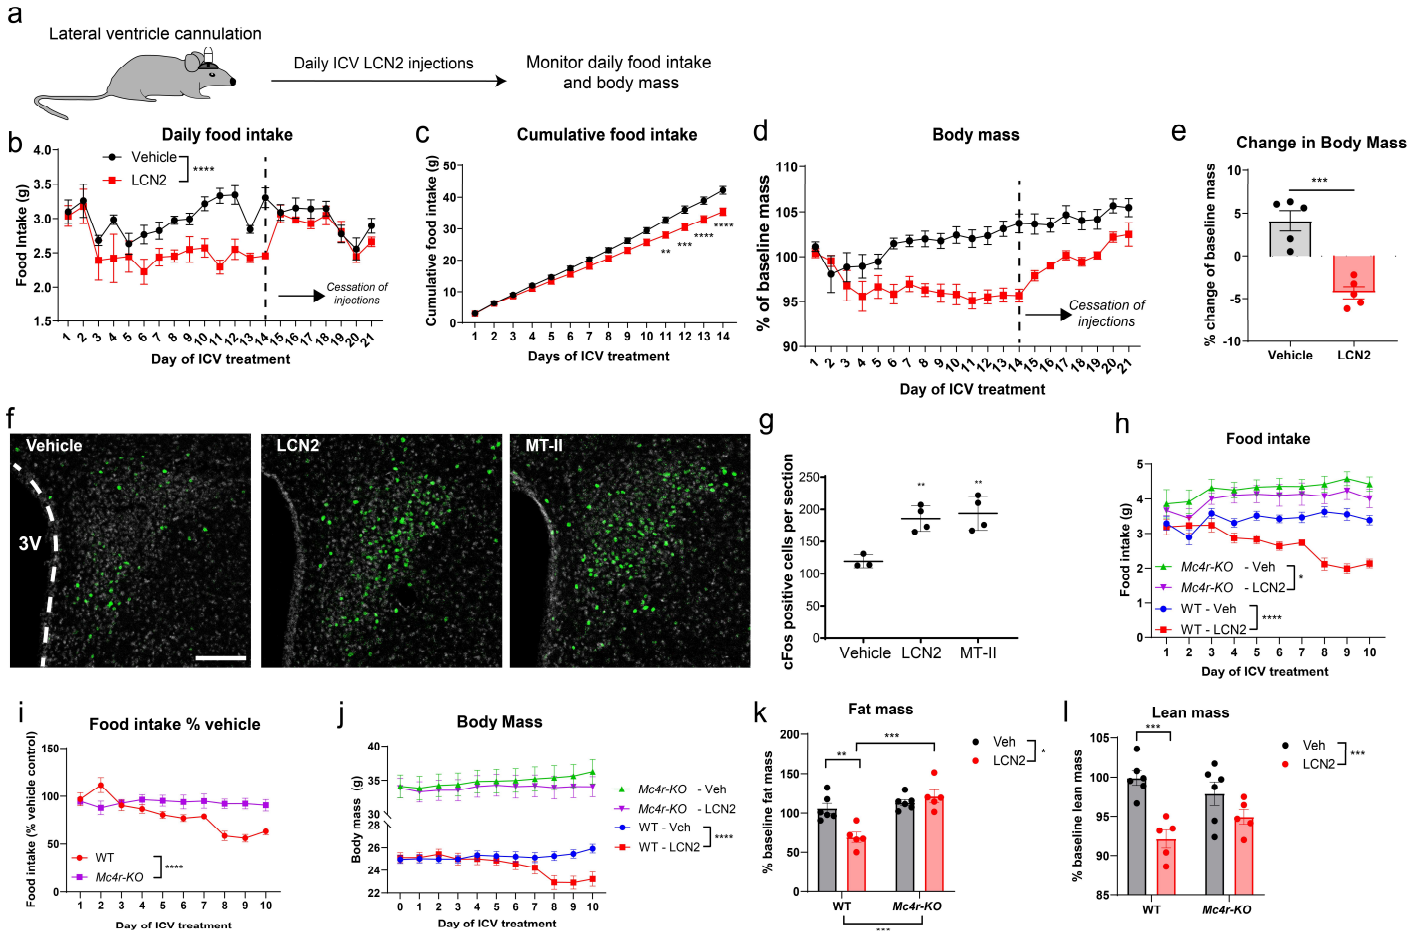

Supplementary Figure 5. Related to Figure 5. (A) Experimental protocol for ICV administration of LCN2 (40 ng) or vehicle control. (B) Daily and (C) cumulative food intake. (D) Daily change in body mass as a percentage of baseline mass. (E) Change in body mass at the end of the ICV treatment period (14 days). B-E; N = 5 per group. After day 14, ICV treatment was stopped and food intake and body weight data were collected for another week. (F) Representative images of paraventricular nucleus cFos staining 90 minutes after ICV administration of LCN2 (40 ng), MT-II (1 nmol), or vehicle (scale bar = 100 μm). (G) Quantification of cFos positive cells using the average count in three consecutive sections per mouse (N = 3 for the ICV vehicle group; N = 4 for the ICV LCN2 and MT-II groups). 3V = third ventricle. ICV = intracerebroventricular. (H) Daily food intake, (I) genotype-normalized food intake, (J) daily body mass, and terminal (K) fat and (L) lean mass in WT and *Mc4r*-KO mice receiving ICV vehicle or LCN2 (40 ng). H-L; N = 6 per group for WT ICV vehicle and *Mc4r*KO ICV vehicle groups; N = 5 per group for WT ICV LCN2 and *Mc4r*KO ICV LCN2 groups). All data are expressed as mean ± SEM. ICV = intracerebroventricular. A-E, K-L; Black = ICV Vehicle, Red = ICV LCN2. H-J; Blue = WT ICV vehicle injection, Red = WT ICV LCN2 injection, Green = *Mc4r*-KO ICV vehicle injection, Purple = *Mc4r*-KO ICV LCN2 injection.

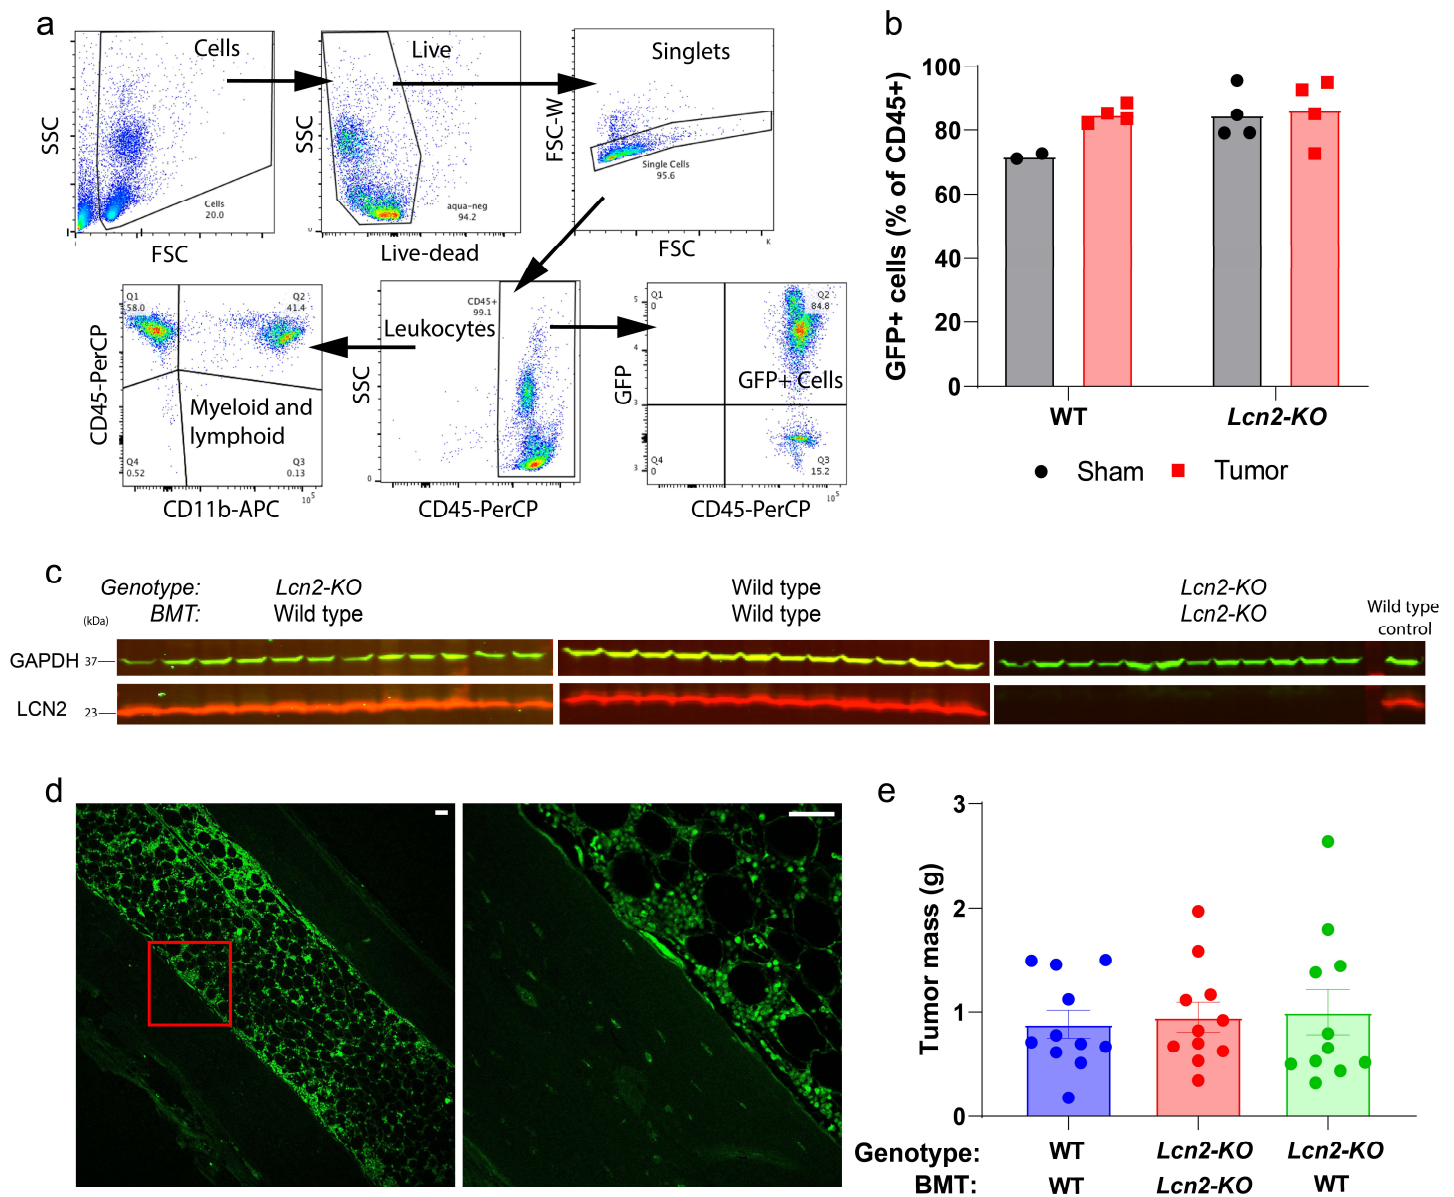

Supplementary Figure 6. Related to Figure 5. (A) Gating strategy for flow cytometry analysis of circulating GFP<sup>+</sup> immune cells after generation of GFP<sup>+</sup> bone marrow chimeras. (B) Quantification of GFP<sup>+</sup> as a percentage of CD45<sup>+</sup> cells in WT and *Lcn2-KO* mice after sham operation or tumor implantation. (C) Representative bone marrow Western blots confirming successful bone marrow engraftment and expression of LCN2. (D) Representative confocal images of cortical and spongy bone in a WT mouse after receiving Ly5.1 eGFP bone marrow transplantation (scale bar = 50 $\mu$ m). (E) Terminal tumor mass for all mice included in the bone marrow transplantation studies. C; LCN2 molecular weight = 23 kDa, GAPDH = 37 kDa. All data are expressed as mean  $\pm$  SEM. BMT = bone marrow transplantation. For B, no statistics were performed, as only n = 2 was achieved for the WT sham operation control. E was analyzed by one-way ANOVA. B; Grey = sham operation control, Red = KPC-engrafted mice. E; Blue = WT/WT-BMT KPC-engrafted mice, Red = *Lcn2-KO*/*Lcn2-KO*-BMT KPC-engrafted mice, Green = *Lcn2-KO*/WT-BMT KPC-engrafted mice.



|                                  |                                         |                 |
|----------------------------------|-----------------------------------------|-----------------|
|                                  |                                         | Total (N = 100) |
| Age                              |                                         | 62.3 (11.3)     |
| Sex                              | Male                                    | 51              |
|                                  | Female                                  | 49              |
| BMI (kg/m2)                      | Mean                                    | 27.2 (5.6)      |
|                                  | Binned <18.5                            | 4               |
|                                  | 18.5-24.9                               | 33              |
|                                  | 25-29.9                                 | 39              |
|                                  | 29.9-34.9                               | 16              |
|                                  | >35                                     | 8               |
| Days from diagnosis to treatment |                                         | 32.6 (20.3)     |
| Tumor location                   | Head                                    | 62              |
|                                  | Body                                    | 6               |
|                                  | Tail                                    | 4               |
|                                  | Overlapping                             | 5               |
|                                  | NOS                                     | 23              |
| Cancer Stage                     | 0                                       | 2               |
|                                  | IA                                      | 0               |
|                                  | IB                                      | 4               |
|                                  | IIA                                     | 19              |
|                                  | IIB                                     | 41              |
|                                  | III                                     | 10              |
|                                  | IV                                      | 23              |
|                                  | Unknown                                 | 1               |
| Neoadjuvant Therapy              | Chemo No                                | 72              |
|                                  | Yes                                     | 12              |
|                                  | Unknown                                 | 16              |
|                                  | RT No                                   | 81              |
|                                  | Yes                                     | 10              |
|                                  | Unknown                                 | 9               |
| Tumor resection                  | No                                      | 33              |
|                                  | Yes                                     | 67              |
| Adjuvant Chemotherapy            | No                                      | 18              |
|                                  | Yes                                     | 49              |
| Chemotherapy regimens            | Gemcitabine                             | 32              |
|                                  | FOLFIRINOX                              | 14              |
|                                  | Gemcitabine/nab-paclitaxel              | 17              |
|                                  | FOLFIRINOX + Gemcitabine/nab-paclitaxel | 2               |
|                                  | FOLFOX                                  | 1               |
|                                  | Gemcitabine/cisplatin                   | 1               |
|                                  | Gemcitabine/HAP                         | 4               |
|                                  | Unknown                                 | 11              |
| Immune cell                      | NEUTROPHIL %                            | 65.8 (16.6)     |
|                                  | LYMPHOCYTE %                            | 19.3 (11.5)     |
|                                  | Neutrophil/Lymphocyte ratio             | 6.6 (7.7)       |
| Plasma LCN2 (ng/mL)              |                                         | 150.3 (90.8)    |

Supplementary table 1. Related to Figure 7A-C. Patient demographics, treatment, and biomarker data. Abbreviations: BMI, body mass index; NOS, not otherwise specified; HAP, hypoxic abdominal perfusion; FOLFIRINOX, 5-fluorouracil, leucovorin, irinotecan, and oxaliplatin; FOLFOX, 5-fluorouracil, leucovorin, and oxaliplatin. RT, radiotherapy; CA19-9, cancer antigen 19-9. Standard deviation presented in parentheses where appropriate.

|                                  |                                         |           |                 |
|----------------------------------|-----------------------------------------|-----------|-----------------|
|                                  |                                         |           | N = 22          |
| Age                              |                                         |           | 62.2 (12.9)     |
| Sex                              | Male                                    |           | 13              |
|                                  | Female                                  |           | 9               |
| BMI (kg/m2)                      | Mean                                    |           | 26.9 (4.8)      |
|                                  | Binned                                  | <18.5     | 1               |
|                                  |                                         | 18.5-24.9 | 6               |
|                                  |                                         | 25-29.9   | 10              |
|                                  |                                         | 29.9-34.9 | 5               |
| Days from diagnosis to treatment |                                         |           | 36.2 (23.8)     |
| Tumor location                   | Head                                    |           | 12              |
|                                  | Body                                    |           | 2               |
|                                  | Tail                                    |           | 0               |
|                                  | Overlapping                             |           | 0               |
|                                  | NOS                                     |           | 8               |
| Cancer Stage                     | IA                                      |           | 1               |
|                                  | IB                                      |           | 0               |
|                                  | IIA                                     |           | 2               |
|                                  | IIB                                     |           | 5               |
|                                  | III                                     |           | 5               |
|                                  | IV                                      |           | 9               |
| Neoadjuvant Therapy              | Chemo                                   | No        | 9               |
|                                  |                                         | Yes       | 4               |
|                                  |                                         | Unknown   | 9               |
|                                  | RT                                      | No        | 16              |
|                                  |                                         | Yes       | 4               |
|                                  |                                         | Unknown   | 2               |
| Tumor resection                  | No                                      |           | 15              |
|                                  | Yes                                     |           | 7               |
| Adjuvant Chemotherapy            | No                                      |           | 1               |
|                                  | Yes                                     |           | 6               |
| Chemotherapy regimens            | Gemcitabine                             |           | 3               |
|                                  | FOLFIRINOX                              |           | 5               |
|                                  | Gemcitabine/nab-paclitaxel              |           | 9               |
|                                  | FOLFIRIONX + Gemcitabine/nab-paclitaxel |           | 1               |
|                                  | FOLFOX                                  |           | 1               |
|                                  | Unknown                                 |           | 2               |
| Plasma LCN2 (ng/mL)              | Baseline                                |           | 217.5 (175.9)   |
|                                  | Follow up                               |           | 263.5 (138.2)   |
| CA19-9                           |                                         |           | 1537.9 (4670.1) |
| Body Composition                 | SMI                                     | Baseline  | 38.8 (8.1)      |
|                                  |                                         | Follow up | 33.8 (13.8)     |
|                                  | Visceral adipose                        | Baseline  | 33.2 (27.9)     |
|                                  |                                         | Follow up | 22.6 (38.6)     |

Supplementary table 2. Related to Figure 7E-F. Patient demographics, treatment, and biomarker data. Abbreviations: BMI, body mass index; NOS, not otherwise specified; FOLFIRINOX, 5-fluorouracil, leucovorin, irinotecan, and oxaliplatin; FOLFOX, 5-fluorouracil, leucovorin, and oxaliplatin. RT, radiotherapy; CA19-9, cancer antigen 19-9. Standard deviation presented in parentheses where appropriate.

|                                  |                                |           | LCN2 <240<br>ng/mL (N = 111) | LCN2 >240<br>ng/mL (N = 17) | P value |
|----------------------------------|--------------------------------|-----------|------------------------------|-----------------------------|---------|
| Age                              |                                |           | 63.8 (10.9)                  | 59.4 (13.9)                 | 0.14    |
| Sex                              | Male                           |           | 56                           | 7                           | 0.480   |
|                                  | Female                         |           | 55                           | 10                          |         |
| BMI (kg/m2)                      | Mean                           |           | 27.3 (5.6)                   | 27.8 (6.0)                  | 0.73    |
|                                  | Binned                         | <18.5     | 4                            | 0                           | 0.930   |
|                                  |                                | 18.5-24.9 | 36                           | 6                           |         |
|                                  |                                | 25-29.9   | 43                           | 7                           |         |
|                                  |                                | 29.9-34.9 | 16                           | 2                           |         |
| >35                              | 10                             | 2         |                              |                             |         |
| Days from diagnosis to treatment |                                |           | 34.1 (27.2)                  | 31.9 (17.8)                 | 0.75    |
| Tumor location                   | Head                           |           | 71                           | 8                           | 0.040   |
|                                  | Body                           |           | 5                            | 2                           |         |
|                                  | Tail                           |           | 6                            | 0                           |         |
|                                  | Overlapping                    |           | 3                            | 3                           |         |
|                                  | NOS                            |           | 26                           | 4                           |         |
| Cancer Stage                     | 0                              |           | 2                            | 0                           | 0.590   |
|                                  | IA                             |           | 1                            | 0                           |         |
|                                  | IB                             |           | 7                            | 1                           |         |
|                                  | IIA                            |           | 20                           | 4                           |         |
|                                  | IIB                            |           | 43                           | 3                           |         |
|                                  | III                            |           | 12                           | 4                           |         |
| IV                               |                                | 26        | 5                            |                             |         |
| Median survival time (mo)        |                                |           | 17.44                        | 11                          |         |
| Neoadjuvant<br>Therapy           | Chemo                          | No        | 82                           | 11                          | 0.670   |
|                                  |                                | Yes       | 12                           | 2                           |         |
|                                  |                                | Unknown   | 17                           | 4                           |         |
|                                  | RT                             | No        | 93                           | 14                          | 0.850   |
|                                  |                                | Yes       | 9                            | 2                           |         |
|                                  | Unknown                        | 9         | 1                            |                             |         |
| Tumor resection                  | No                             |           | 35                           | 9                           | 0.100   |
|                                  | Yes                            |           | 76                           | 8                           |         |
| Adjuvant Chemotherapy            | No                             |           | 20                           | 3                           | 0.680   |
|                                  | Yes                            |           | 56                           | 5                           |         |
| Chemotherapy regimens            | Gemcitabine                    |           | 36                           | 3                           | 0.110   |
|                                  | FOLFIRINOX                     |           | 16                           | 0                           |         |
|                                  | FOLFIRI                        |           | 1                            | 0                           |         |
|                                  | Gemcitabine/nab-<br>paclitaxel |           | 17                           | 5                           |         |
|                                  | FOLFIRIONX                     | +         |                              |                             |         |
|                                  | Gemcitabine/nab-<br>paclitaxel |           | 1                            | 2                           |         |
|                                  | FOLFOX                         |           | 1                            | 0                           |         |
|                                  | Gemcitabine/cisplatin          |           | 2                            | 1                           |         |
|                                  | Gemcitabine/HAP                |           | 3                            | 1                           |         |
|                                  | Unknown                        |           | 14                           | 2                           |         |

|                               |                |                |       |
|-------------------------------|----------------|----------------|-------|
| Plasma LCN2 Diagnosis (ng/mL) | 125.9 (46.8)   | 400.4 (136.5)  | <0.01 |
| CA19-9                        | 929.6 (2845.4) | 997.2 (2092.5) | 0.93  |

Supplementary table 3. Related to Figure 7G. Patient demographics, treatment, and biomarker data dichotomized by a 240 ng/mL baseline LCN2 threshold. Abbreviations: BMI, body mass index; NOS, not otherwise specified; HAP, hypoxic abdominal perfusion; FOLFIRINOX, 5-fluorouracil, leucovorin, irinotecan, and oxaliplatin; FOLFOX, 5-fluorouracil, leucovorin, and oxaliplatin; FOLFIRI, 5-fluorouracil, leucovorin, and irinotecan. RT, radiotherapy; CA19-9, cancer antigen 19-9. Standard deviation presented in parentheses where appropriate. P-values calculated using Student's t-test for continuous variables,  $\chi^2$  or Fisher's Exact Test for categorical variables. When applicable, all statistical tests were two-tailed.

| Target                  | Name                                                                                  | Manufacturer            | Catalog | Dilution | FMO Prepared |
|-------------------------|---------------------------------------------------------------------------------------|-------------------------|---------|----------|--------------|
| CD11b<br>BB515          | Integrin alpha M                                                                      | BioLegend               | #101206 | 1:125    | Yes          |
| CD19 APC                | Cluster of differentiation 19                                                         | BioLegend               | #115541 | 1:125    | No           |
| CD3 PE-<br>Cy7          | Cluster of differentiation 3                                                          | BD Horizon              | #564010 | 1:125    | Yes          |
| CD45<br>PerCP-<br>Cy5.5 | Protein tyrosine phosphatase, receptor type, C                                        | BD Pharmingen           | #552848 | 1:125    | No           |
| Ly6C APC-<br>Cy7        | Lymphocyte antigen 6 complex, locus C1                                                | BioLegend               | #128028 | 1:200    | Yes          |
| Ly6G<br>BV421           | Lymphocyte antigen 6 complex locus G6D                                                | BioLegend               | #127622 | 1:200    | Yes          |
| Live Dead<br>Aqua       | (N/A)                                                                                 | Invitrogen              | #L34957 | 1:200    | N/A          |
| LCN2                    | Lipocalin 2                                                                           | R&D                     | #AF1857 | 1:100    | N/A          |
| Anti-Goat-<br>PE        | F(ab') <sub>2</sub> -Donkey anti-Goat IgG (H+L) Cross-Adsorbed Secondary Antibody, PE | ThermoFisher Scientific | #31860  | 1:200    | N/A          |

Supplementary table 4: Materials used for flow cytometry

| <b>Gene</b>       | <b>Name</b>                                      | <b>Catalog/sequence</b> | <b>Tissue(s)</b>     |
|-------------------|--------------------------------------------------|-------------------------|----------------------|
| <i>Mafbx</i>      | Muscle atrophy F-box                             | Mm00399518_m1           | Gastrocnemius, heart |
| <i>Murf1</i>      | Muscle ring finger 1                             | Mm01185221_m1           | Gastrocnemius, heart |
| <i>Foxo1</i>      | Forkhead box O1                                  | Mm00490672_m1           | Gastrocnemius, heart |
| <i>Bnip3</i>      | BCL2 Interacting Protein 3                       | Mm01275600_g1           | Heart                |
| <i>Ctsl1</i>      | Cathepsin L1                                     | Mm00515597_m1           | Heart                |
| <i>Gabarapl</i>   | GABA Type A Receptor Associated Protein Like     | Mm00457880_m1           | Heart                |
| <i>Il1b</i>       | Interleukin-1 beta                               | Mm01336189_m1           | Hypothalamus, liver  |
| <i>Il1r1</i>      | Interleukin 1 receptor type 1                    | Mm00434237_m1           | Hypothalamus         |
| <i>Il10</i>       | Interleukin 10                                   | Mm01288386_m1           | Hypothalamus         |
| <i>Nos2</i>       | Nitric oxide synthase 2                          | Mm00440502_m1           | Hypothalamus         |
| <i>Apcs</i>       | Amyloid component, serum <sup>P</sup>            | Mm00488099_g1           | Liver                |
| <i>Il6</i>        | Interleukin 6                                    | Mm00446190_m1           | Liver                |
| <i>Orm1</i>       | Orosomucoid 1                                    | Mm00435456_g1           | Liver                |
| <i>Selp</i>       | P-selectin                                       | Mm00441295_m1           | Liver                |
| <i>18s</i>        | 18s ribosomal subunit                            | 4352930E                | All                  |
| <i>Ucp1</i>       | Thermogenin                                      | Mm01244861_m1           | Adipose tissue       |
| <i>Prdm16</i>     | PR domain containing 16                          | Mm00712556_m1           | Adipose tissue       |
| <i>Ppar-gamma</i> | Peroxisome proliferator-activated receptor gamma | Mm00440940_m1           | Adipose tissue       |
| <i>Cidea</i>      | Cell Death Inducing DFFA Like Effector A         | Mm00432554_m1           | Adipose tissue       |

Supplementary table 5: Primer-probes used for qRT-PCR



| <b>Target<br/>(and<br/>conjugate)</b> | <b>Name</b>                                 | <b>Manufacturer</b> | <b>Catalog</b> | <b>Dilution</b> |
|---------------------------------------|---------------------------------------------|---------------------|----------------|-----------------|
| GAPDH                                 | Glyceraldehyde-3-Phosphate<br>Dehydrogenase | Cell Signaling      | #97166S        | 1:1000          |
| LCN2                                  | Lipocalin 2                                 | R&D                 | #AF1857        | 1:800           |

Supplementary table 6: Antibodies used for western blotting
